# Supplementary material for: First Experimental Study of the Influence of Extracellular Vesicles Derived from Multipotent Stromal Cells on Osseointegration of Dental Implants
Source: MDPI journal article supplement (doi:10.3390/ijms22168774), 2021-08-16
Supplement: s1 [file s1]

Supplementary Materials:

# First Experimental Study Of The Influence Of Extracellular Vesicles Derived From Multipotent Stromal Cells On Osseointegration Of Dental Implants

Igor Maiborodin<sup>1,2,\*</sup>, Aleksandr Shevela<sup>1,3</sup>, Vera Matveeva<sup>1</sup>, Vitaly Morozov<sup>1</sup>, Michael Toder<sup>3</sup>, Sergey Krasil'nikov<sup>1</sup>, Alina Koryakina<sup>3</sup>, Andrew Shevela<sup>1</sup> and Oleg Yanushevich<sup>4</sup>

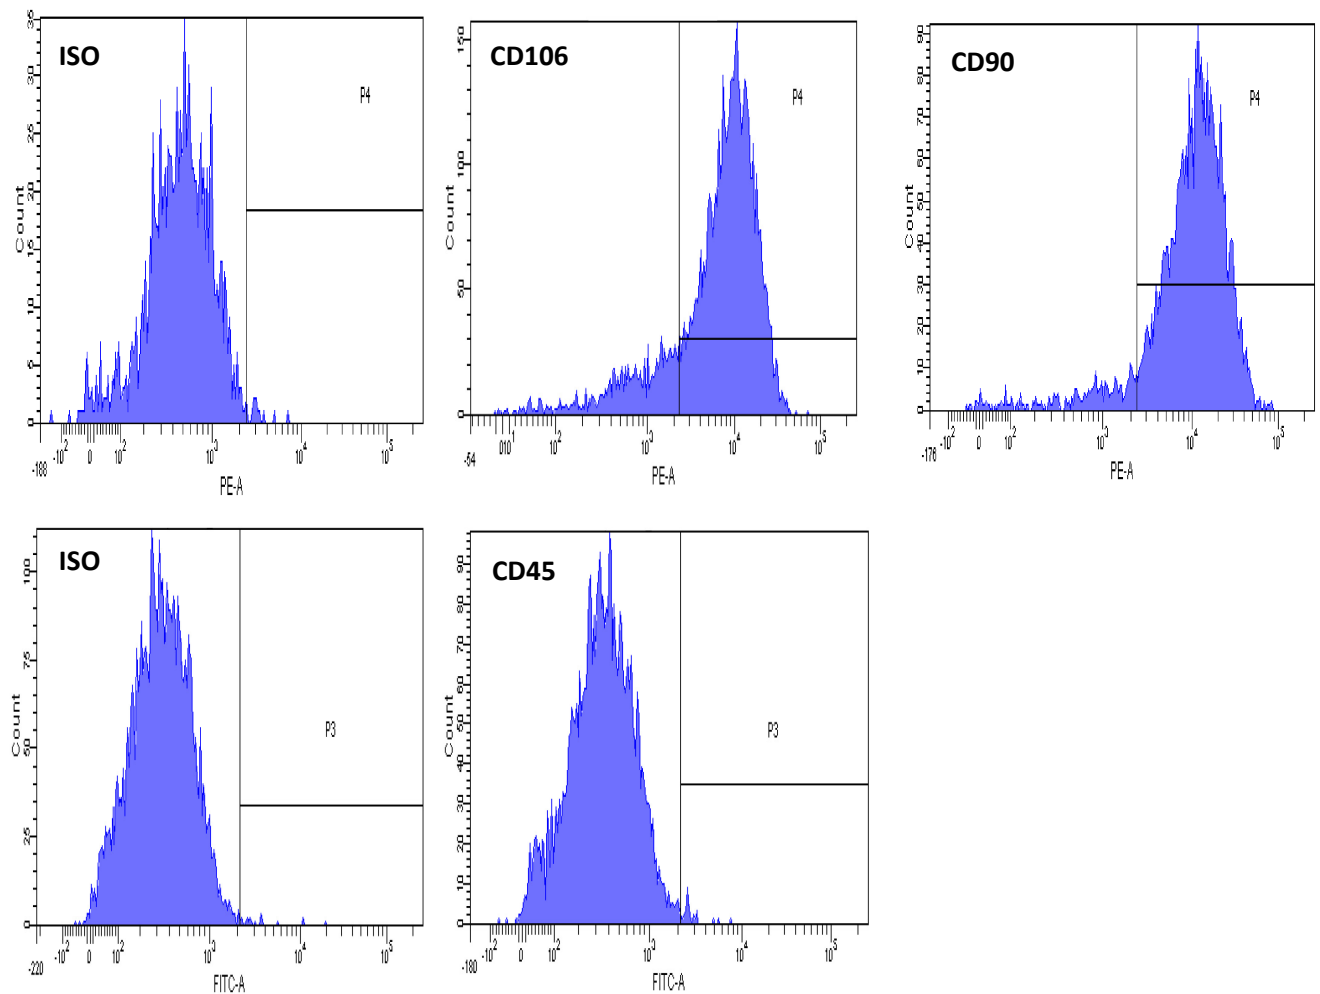

**Figure S1.** The phenotype of rat mesenchymal stem cells (MSCs) derived from the bone-marrow. Data indicate flow cytometry analysis. The MSC of rat were stained with specific antibodies or isotype controls. The samples were analyzed on a flow cytometer "FACSaria" III using FACSDiVa Version 6.1.3. software (Becton Dickinson).
